# Supplementary material for: Selective synthesis of cyclic alcohols from cycloalkanes using nickel(ii) complexes of tetradentate amidate ligands
Source: Royal Society of Chemistry journal article supplement (doi:10.1039/d4ra05222f), 2024-01-01
Supplement: d4ra05222f1.pdf [file d4ra05222f1.pdf]

## **Selective Synthesis of Cyclic Alcohols from Cycloalkanes using Nickel(II) Complexes of Tetradentate Amidate Ligands**

Anjana Rajeev,<sup>a</sup> Sethuraman Muthuramalingam,<sup>b</sup> and Muniyandi Sankaralingam<sup>\*a</sup>

<sup>a</sup>Bioinspired & Biomimetic Inorganic Chemistry Lab, Department of Chemistry, National Institute of Technology Calicut, Kozhikode, Kerala 673601, India

<sup>b</sup>Institut de Química Computacional i Catalisi (IQCC) and Departament de Química, Universitat de Girona, Girona E-17003 Catalonia, Spain.

\*Email: msankaralingam@nitc.ac.in; sankarjan06@gmail.com

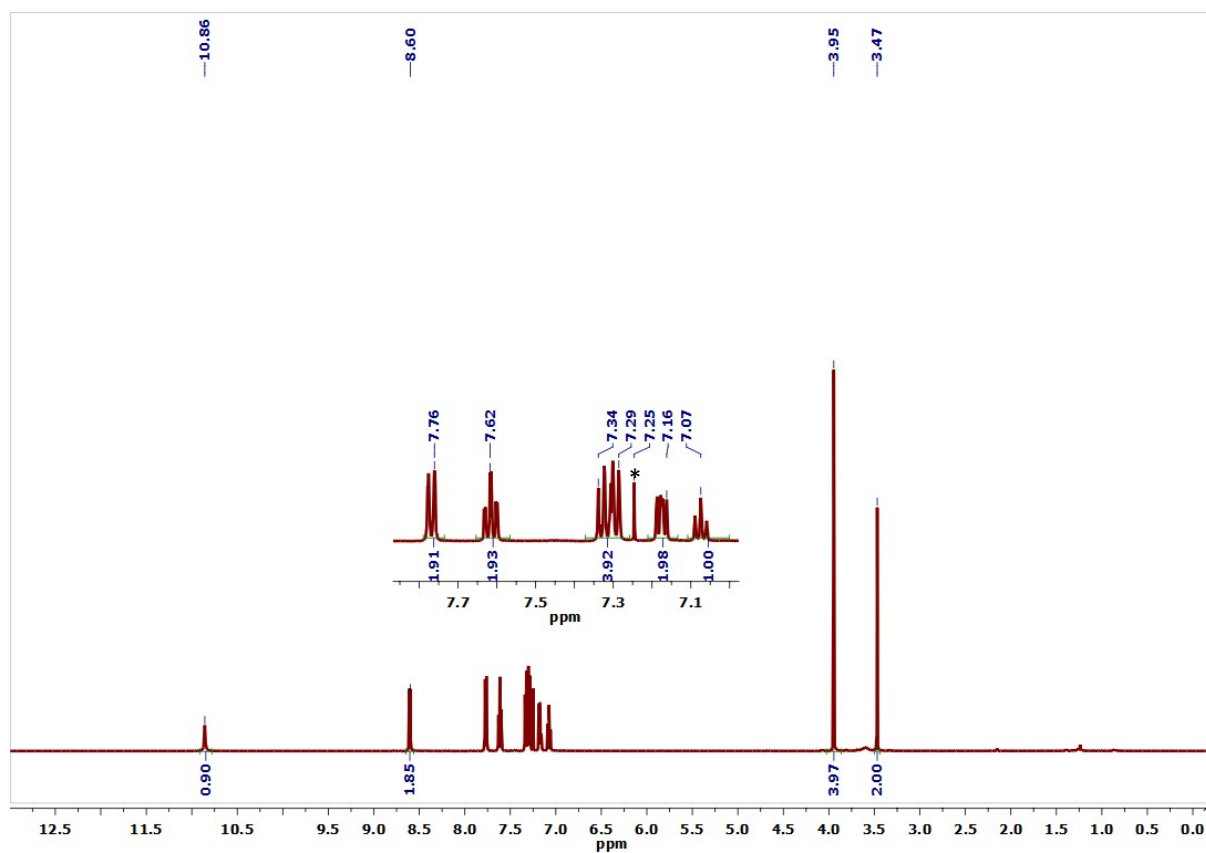

**Figure S1.** <sup>1</sup>H NMR spectrum of ligand L1 (500 MHz, CDCl<sub>3</sub>). The peak marked with \* is the solvent residual peak of CHCl<sub>3</sub> in CDCl<sub>3</sub>.

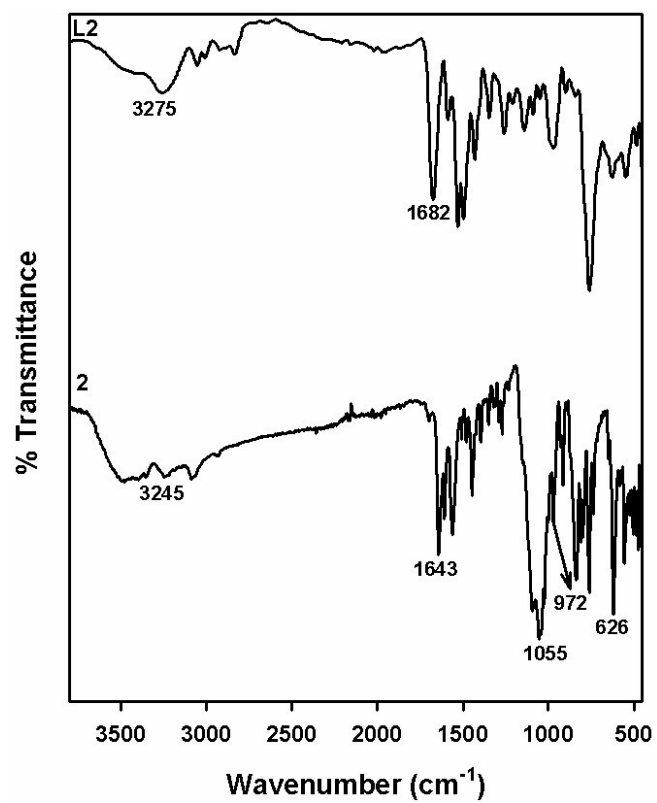

**Figure S2.** ATR-IR spectrum of ligand L2(top) and complex 2 (bottom).

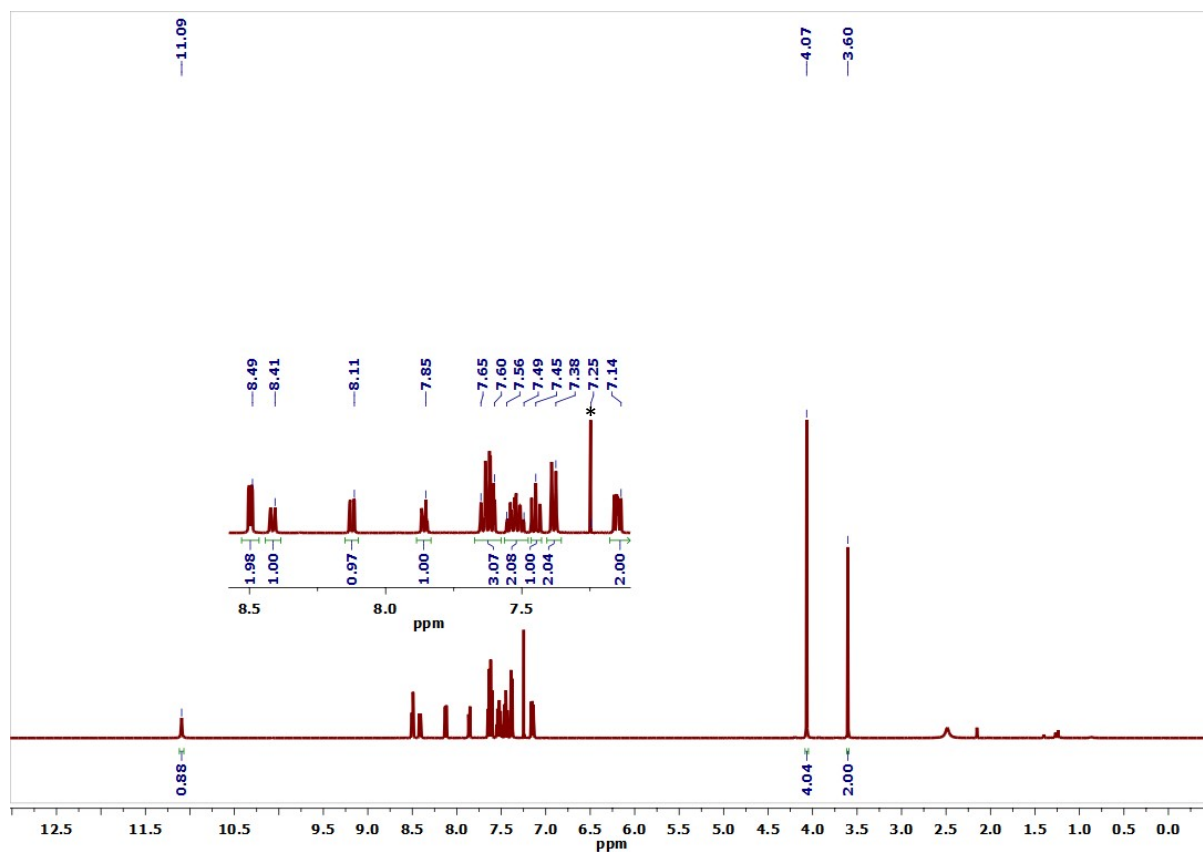

**Figure S3.** <sup>1</sup>H NMR spectrum of ligand L2 (500 MHz, CDCl<sub>3</sub>). The peak marked with \* is the solvent residual peak of CHCl<sub>3</sub> in CDCl<sub>3</sub>.

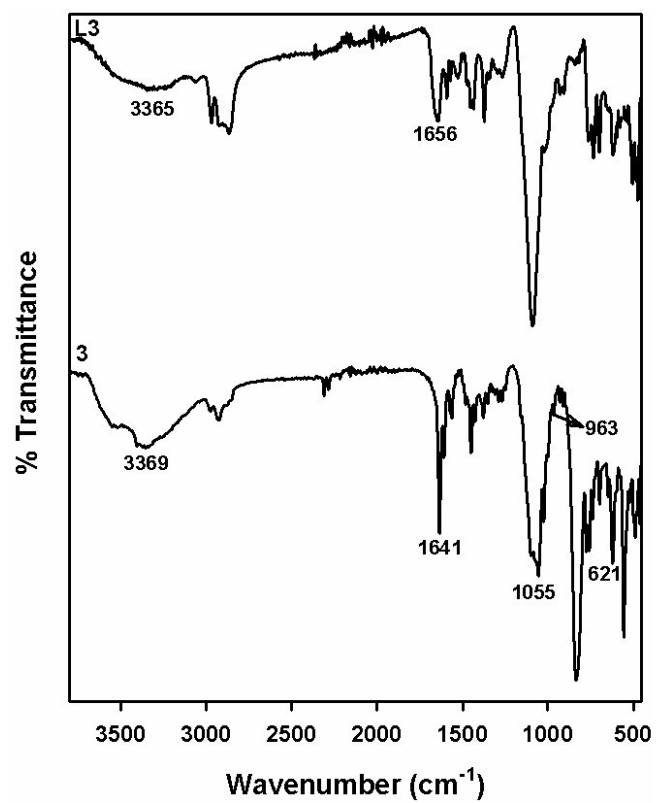

**Figure S4.** ATR-IR spectrum of ligand L3(top) and complex **3** (bottom).

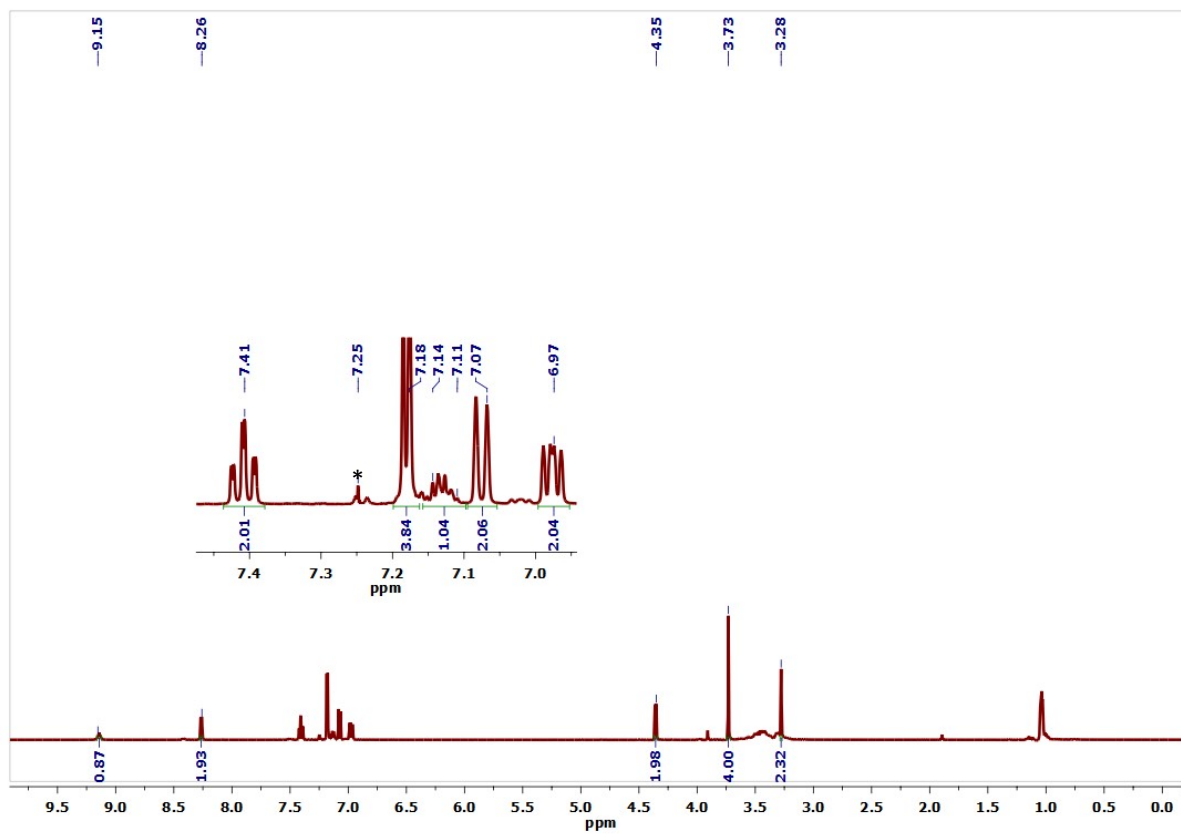

**Figure S5.** <sup>1</sup>H NMR spectrum of ligand L3 (500 MHz, CDCl<sub>3</sub>). The peak marked with \* is the solvent residual peak of CHCl<sub>3</sub> in CDCl<sub>3</sub>.

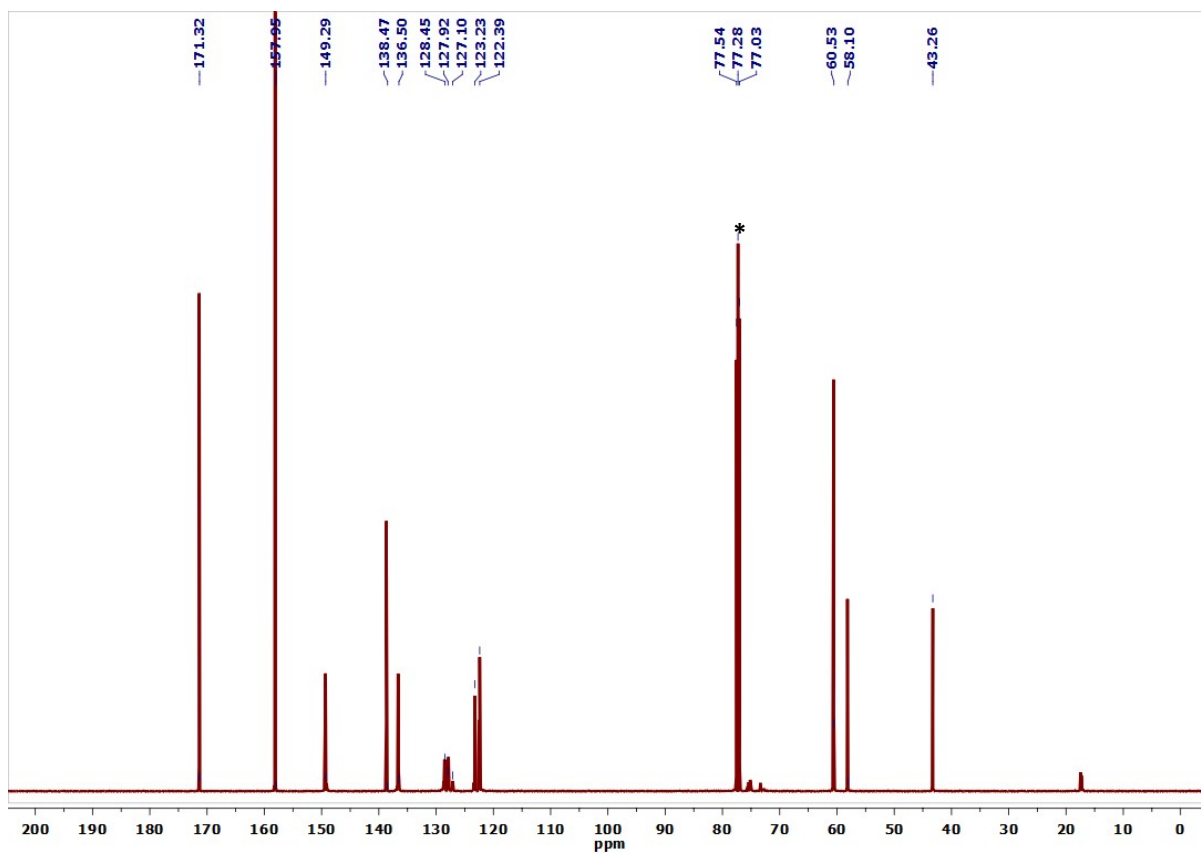

**Figure S6.**  $^{13}\text{C}$  NMR spectrum of ligand L3 (125 MHz,  $\text{CDCl}_3$ ). The peak marked with \* at 77 ppm is coming from the residual  $\text{CDCl}_3$ .

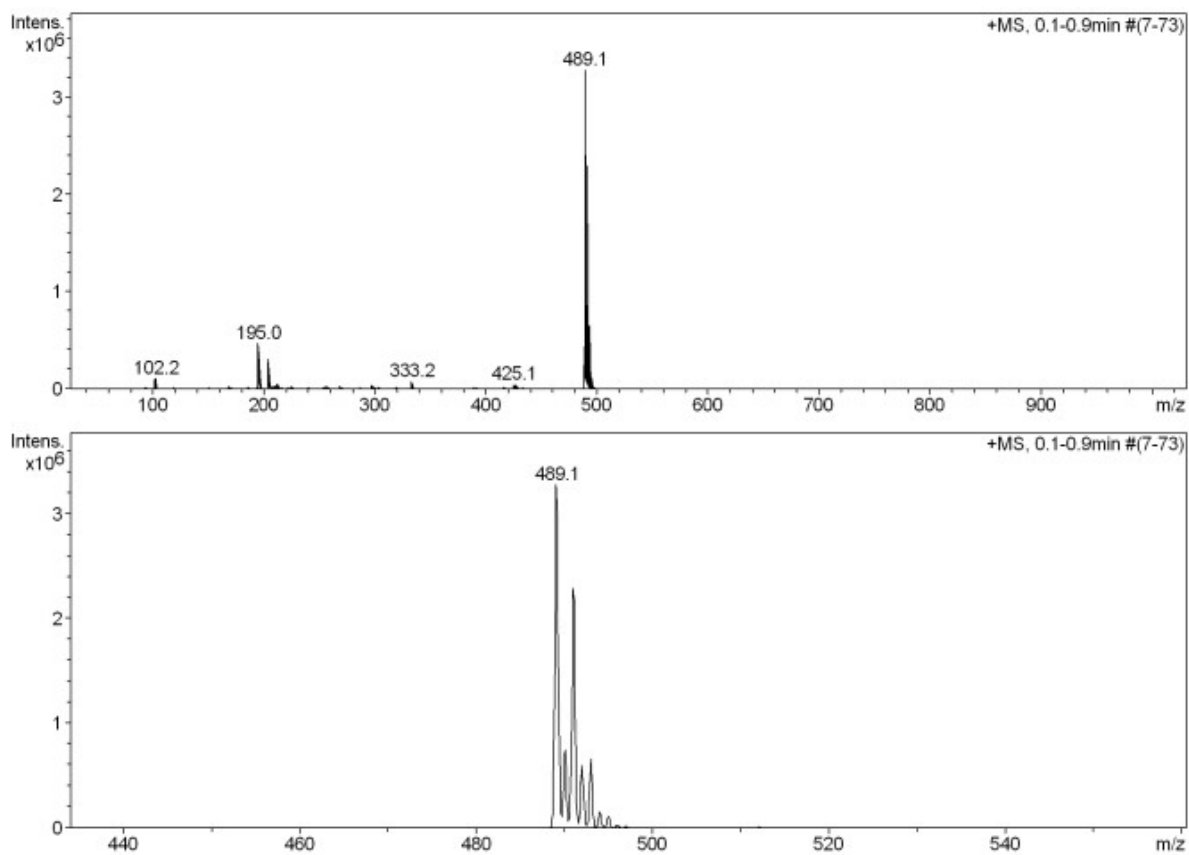

**Figure S7.** ESI-MS spectrum of complex **1** in acetonitrile (positive ion mode).



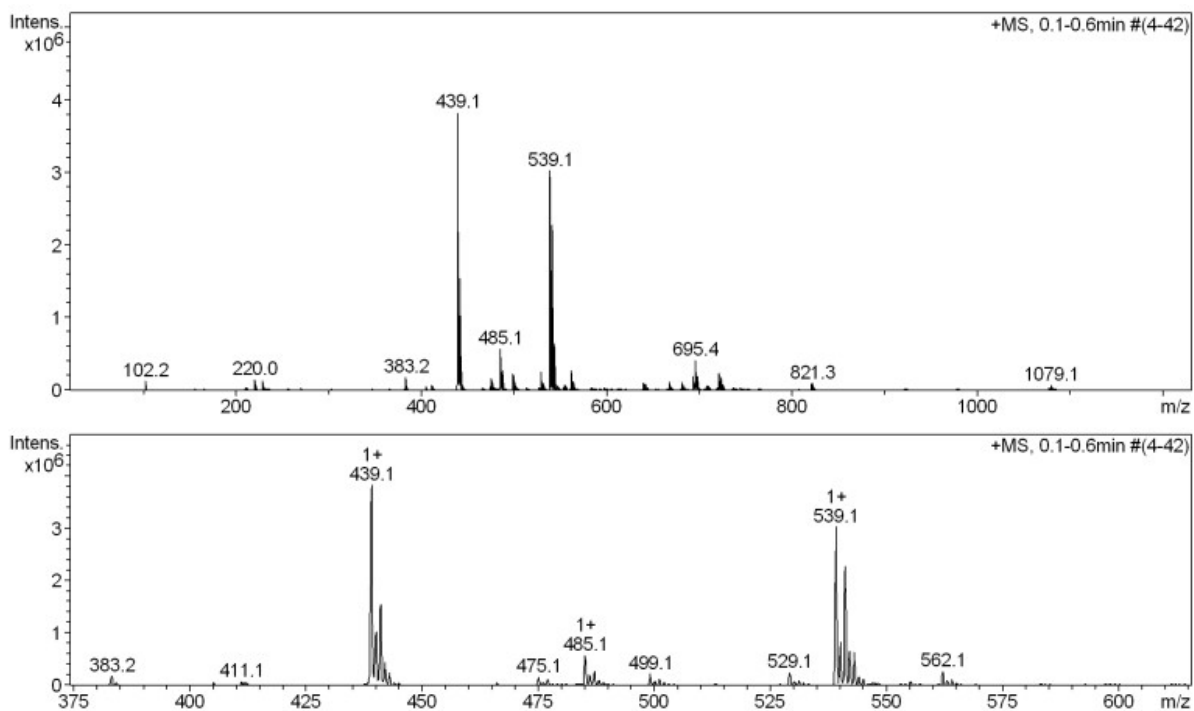

**Figure S8.** ESI-MS spectrum of complex 2 in acetonitrile (positive ion mode).

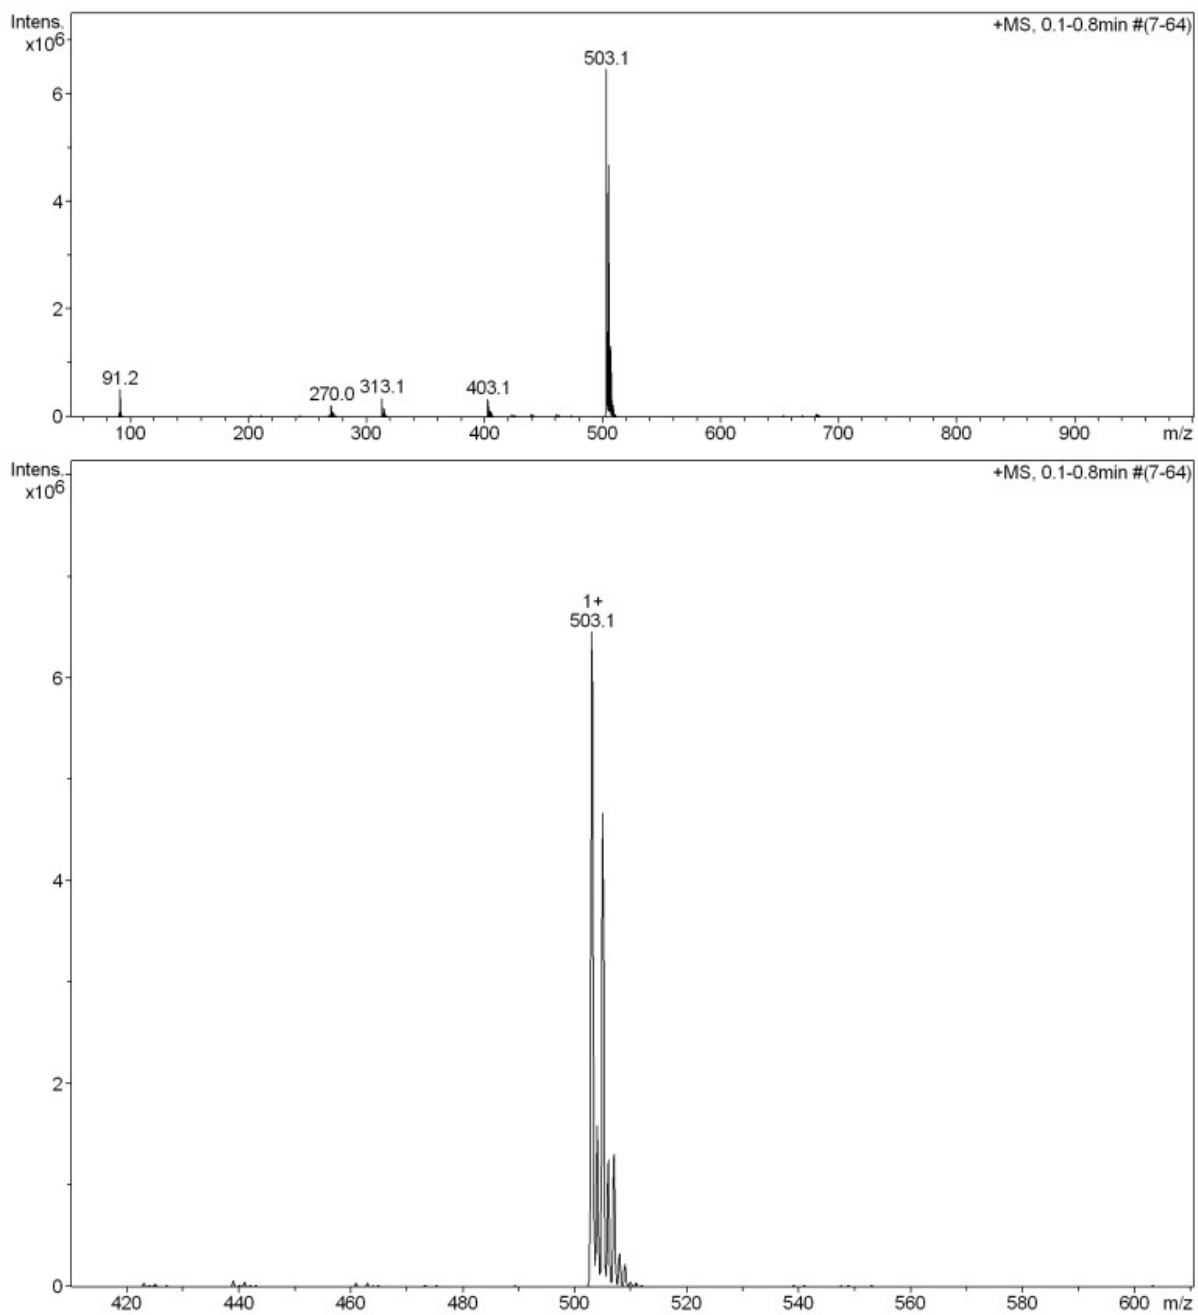

**Figure S9.** ESI-MS spectrum of complex **3** in acetonitrile (positive ion mode).

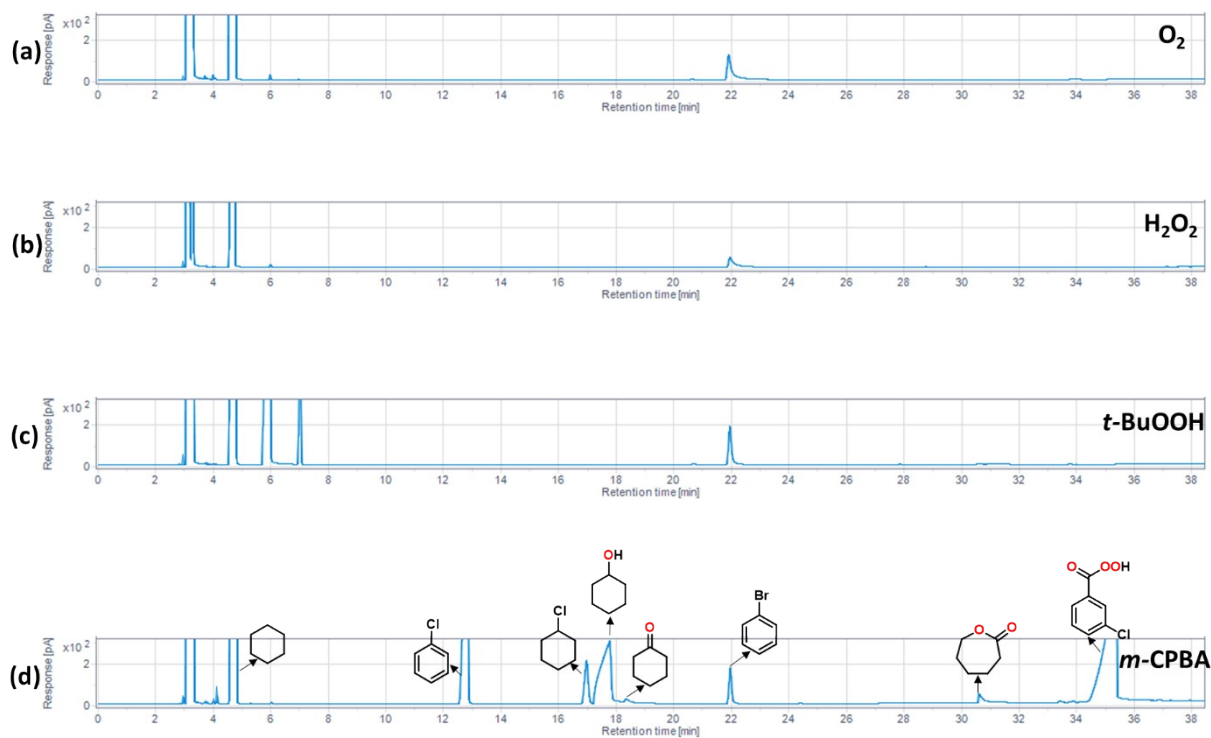

**Figure S10.** Gas chromatographs for the post-reaction mixture of cyclohexane oxidation catalysed by **1** using oxidants (a) molecular oxygen, (b) hydrogen peroxide, (c) *t*-butyl hydroperoxide, and (d) *m*-CPBA

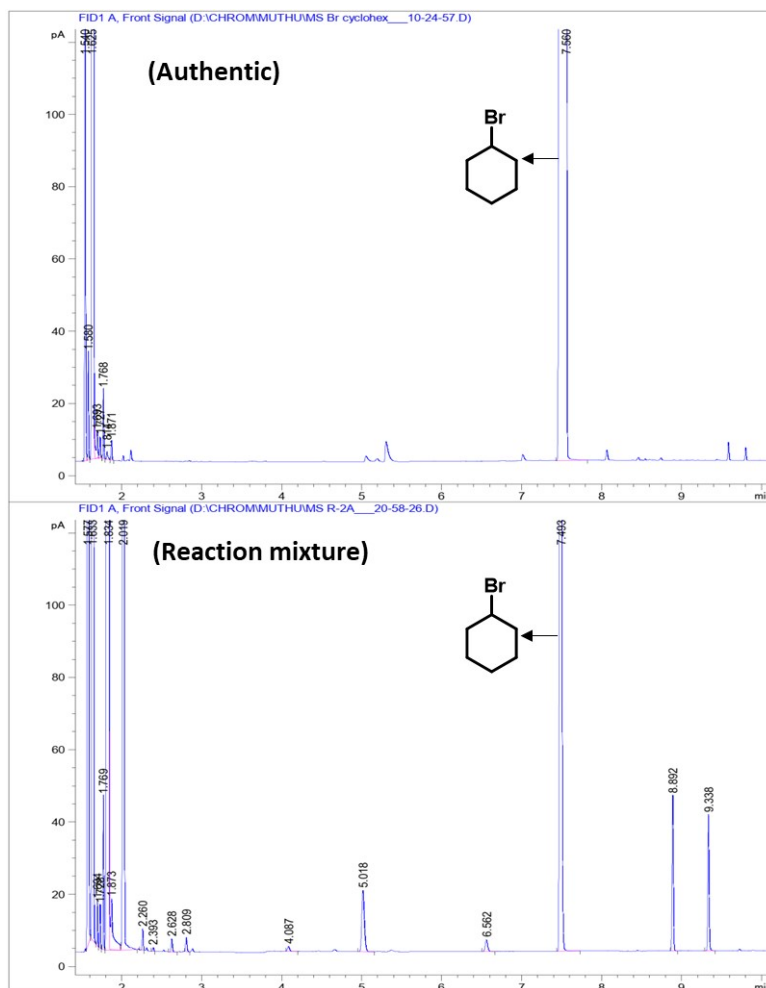

**Figure S11.** Gas chromatographs of authentic bromocyclohexane sample (top) and post-reaction mixture of cyclohexane oxidation in the presence of carbon tetrabromide.

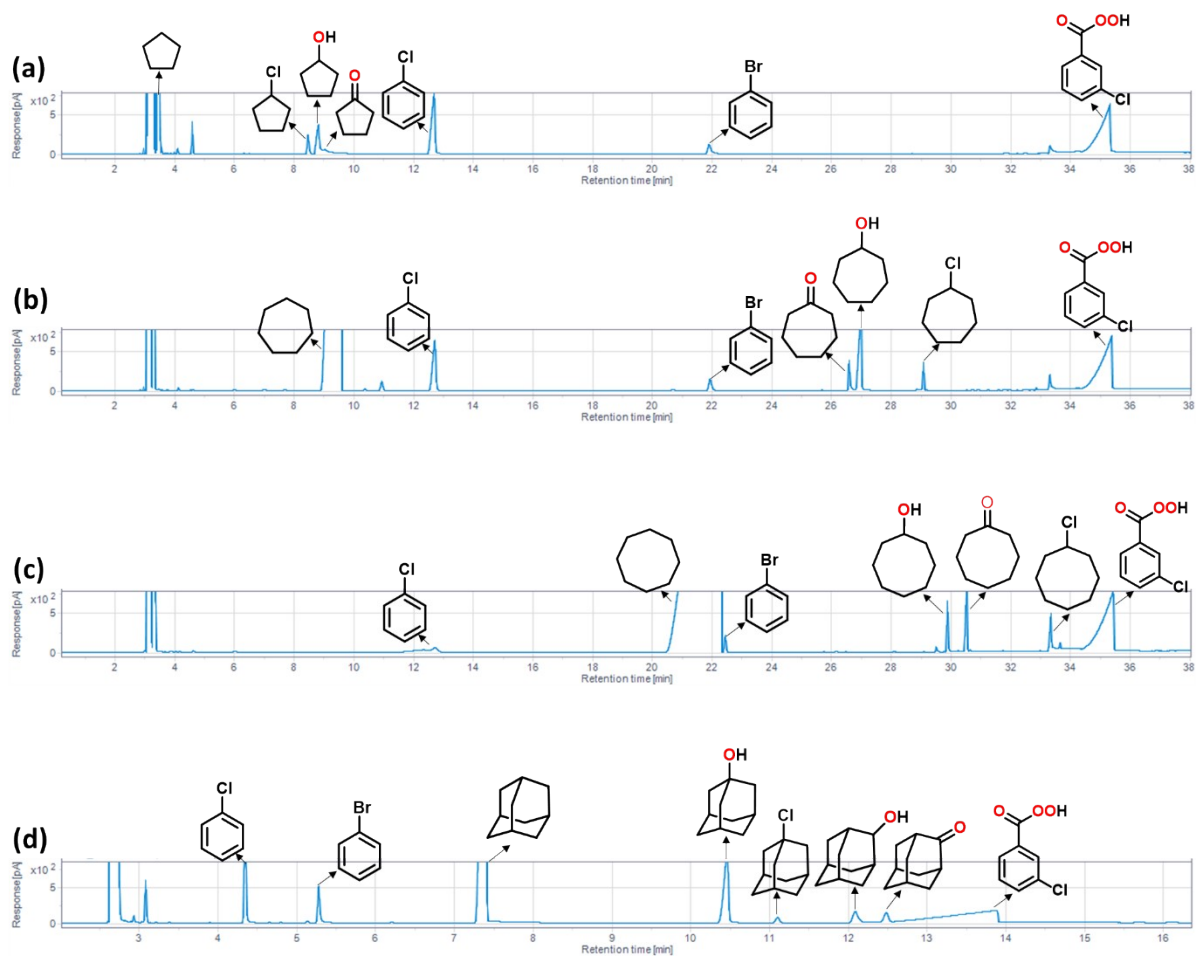

**Figure S12.** Gas chromatographs for the post-reaction mixture of (a) cyclopentane, (b) cycloheptane, (c) cyclooctane and (d) adamantane oxidation using the catalyst **1**.

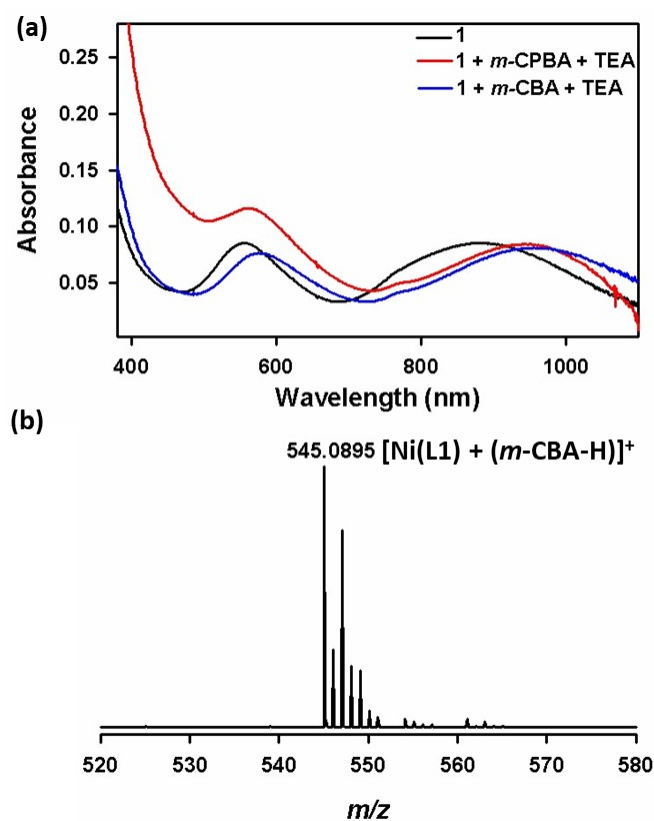

**Figure S13.** (a) UV-vis spectra of complex **1** (5 mM, black line), the reaction mixture containing **1** (5 mM), TEA (1 equiv.) and *m*-CPBA (1 equiv.) (red line) and the reaction mixture containing **1** (5 mM), TEA (1 equiv.) and *m*-CBA (1 equiv.) (blue line) in acetonitrile at room temperature. (b) HRMS spectrum of the reaction mixture containing **1** (5mM), TEA (1 equiv.) and *m*-CPBA (1 equiv.) in acetonitrile at room temperature.

**Table S1.** Oxidation of adamantane using **1**.

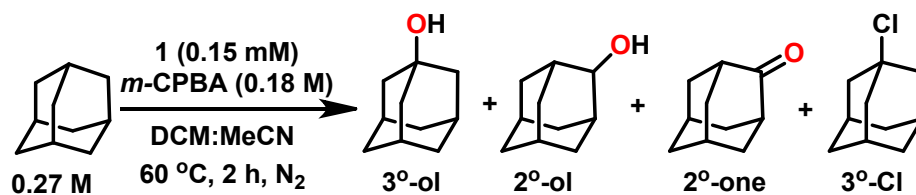

| Substrate <sup>a</sup> | 3°-ol<br>TON | 2°-ol<br>TON | 2°-one<br>TON | 3°-Cl<br>TON | Total<br>TON <sup>b</sup> | 3°/2° <sup>c</sup> |
|------------------------|--------------|--------------|---------------|--------------|---------------------------|--------------------|
| Adamantane             | 237          | 83           | 4             | 13           | 337                       | 8.6                |

3°-ol = 1-adamantanol, 2°-ol = 2-adamantanol, 2°-one = 2-adamantanone, 3°-Cl = 1-chloroadamantane, 2°-Cl = 2-chloroadamantane. <sup>a</sup> Reaction Conditions: Adamantane (0.27 M), Oxidant (0.18 M), Catalyst (0.15 mM) in DCM:MeCN solvent mixture (v/v = 3:1), 2h under N<sub>2</sub>. <sup>b</sup> TON = number of mmol of product/number of mmol of catalyst. The TON is the average of three determinations. <sup>c</sup> 3°/2° = 3(TON of 3°-ol + TON of 3°-Cl)/(TON of 2°-ol + TON of 2°-one + TON of 2°-Cl).

**Table S2.** Oxidation of methylcyclohexane using **1**.

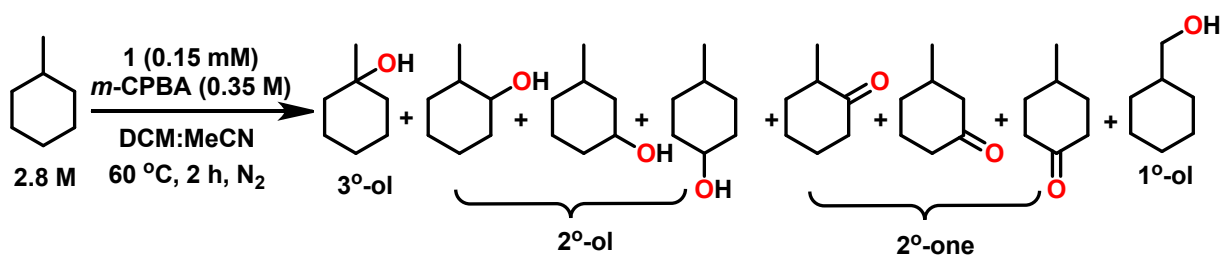

| Catalyst <sup>a</sup> | 3°-ol<br>TON | <i>o</i> -2°-ol<br>TON | <i>m</i> -2°-ol<br>TON | <i>p</i> -2°-ol<br>TON | 2°-ones<br>TON | 1°-ol<br>TON | Total<br>TON <sup>b</sup> | 3°-ol :2°-ols |
|-----------------------|--------------|------------------------|------------------------|------------------------|----------------|--------------|---------------------------|---------------|
| <b>1</b>              | 390          | 114                    | 475                    | 27                     | 67             | 9            | 1082                      | 36:64         |
| <b>none</b>           | 94           | 10                     | 11                     | 5                      | 11             | 2            | 133 <sup>c</sup>          | 82:18         |

3°-ol = 1-methylcyclohexanol, *o*-2°-ol = 2-methylcyclohexanol, *m*-2°-ol = 3-methylcyclohexanol, *p*-2°-ol = 4-methylcyclohexanol, 2°-ones = methylcyclohexanone (2 and 3), 1°-ol = cyclohexylmethanol. <sup>a</sup> Reaction Conditions: Methylcyclohexane (2.8 M), Oxidant (0.35 M), Catalyst (0.15 mM) in DCM:MeCN solvent mixture (v/v = 3:1), 60 °C, 2h under N<sub>2</sub>. <sup>b</sup> TON = number of mmol of product/number of mmol of catalyst. The TON is the average of three determinations. <sup>c</sup> values based on 0.15 mM virtual nickel catalyst.
